# Supplementary material for: Collagen remodeling by phagocytosis is determined by collagen substrate topology and calcium-dependent interactions of gelsolin with nonmuscle myosin IIA in cell adhesions
Source: PubMed Central journal article supplement — Mol Biol Cell. 2013 Mar 15;24(6):734–47. doi: 10.1091/mbc.E12-10-0754 (PMC3596245; doi:10.1091/mbc.e12-10-0754), 2013-03-15

**Supplementary Fig. 1A-** Co-localization of NMMIIA with  $\alpha 2$ -integrin at collagen bead binding sites in gelsolin null and WT cells. **B-** Isolation of full-length NMMIIA from J744 macrophages. Lane 1 shows cell lysate, lane 2 is the crude actomyosin-enriched fraction, which was treated with MgATP to dissociate actin from myosin (lane 3). Lane 4 is the dialysed and concentrated NMMIIA sample. **C-** Myosin preparations immunoblotted for actin at different stages of purification. Middle lane is the crude preparation, left lane is the crude preparation treated with MgATP; right lane shows NMMIIA that has been treated with MgATP and this fraction shows no detectable actin contamination. **D-** Representative images obtained by electron microscopy of negatively-stained NMMIIA filaments diluted to 50 nM in buffer containing 150 mM KCl, 2 mM MgCl<sub>2</sub>, 0.1 mM EGTA, 10 mM MOPS pH 7.0. **E-** Enhanced immunogold labeling of gelsolin on NMMIIA filaments compared with samples stained without primary antibody or NMMIIA filaments without gelsolin. **F -** Control experiment with GST alone shows no interaction with NMMIIA filaments. **G-** GST-Sepharose-bound gelsolin did not co-sediment with His-thioredoxin.

**Supplementary Fig. 2A-** Polymerization curves of G-actin (pyrene-labeled, 2  $\mu$ M actin) after addition of 0.05  $\mu$ M gelsolin or with varying concentrations of NMMIIA (0.025  $\mu$ M, 0.1  $\mu$ M, 0.2  $\mu$ M or 0.4  $\mu$ M) incubated with gelsolin (0.05  $\mu$ M). The fluorescence signal due to Cys-374-bound pyrene is not altered by addition of the NMMIIA-gelsolin complex. **B-** NMMIIA alone had no effect on polymerization. **C-** End-point polymerization (overnight) due to capping of pyrene-labeled actin with 0.05  $\mu$ M gelsolin or with various concentrations of NMMIIA (0.025  $\mu$ M, 0.05  $\mu$ M, 0.1  $\mu$ M, or 0.2  $\mu$ M, 0.4  $\mu$ M) and gelsolin (0.05  $\mu$ M). **D-** NMMIIA alone had no effect on capping of pyrene-labeled actin.

**Supplementary Fig. 3 -A-** Phase contrast images of cells plated on collagen-coated planar surfaces or on 2  $\mu\text{m}$ , 20  $\mu\text{m}$  and 45  $\mu\text{m}$  collagen-coated beads. **B-** Cells plated on collagen-coated beads of 20  $\mu\text{m}$  or 45  $\mu\text{m}$  diameter showed minimal collagen internalization. **C-** Gelsolin null or WT cells were plated on biotinylated collagen for 2 or 8 hours, trypsinized from plates and lysed. Cell lysates were separated by SDS-PAGE, transferred to membranes and the intracellular biotinylated collagen was probed with streptavidin peroxidase. The blots show more extensive collagen proteolysis after 2 and 8 hours in cells expressing gelsolin compared with gelsolin null cells. **D-** Treatment with blebbistatin (50  $\mu\text{M}$ ) did not prevent targeting of NMMIIA and gelsolin to collagen bead sites.

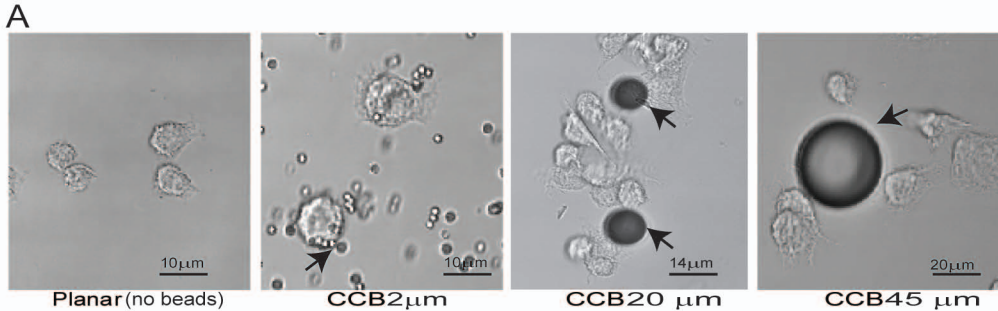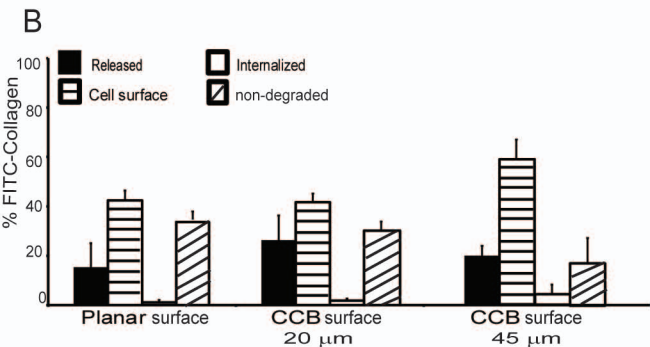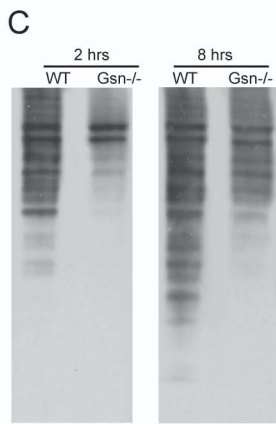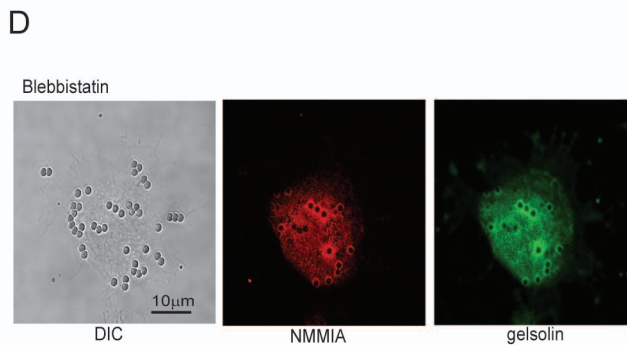

**A**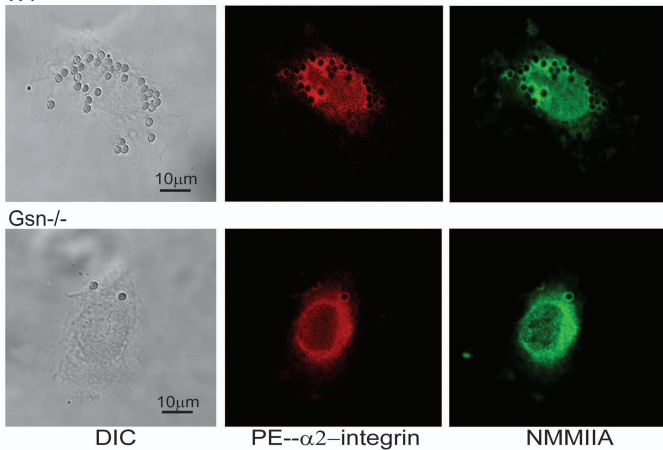**B**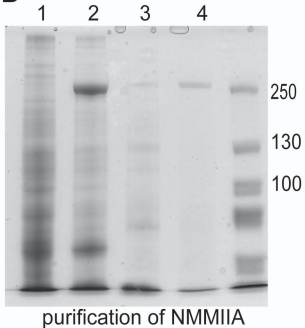**C**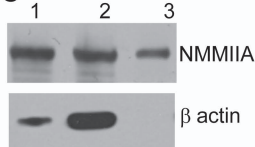**D**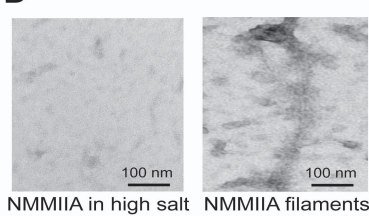**E**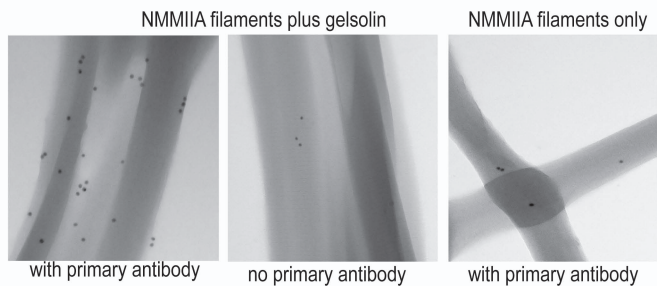**F**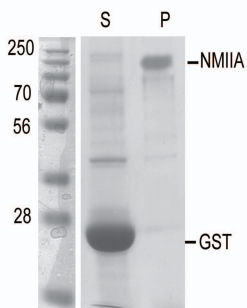**G**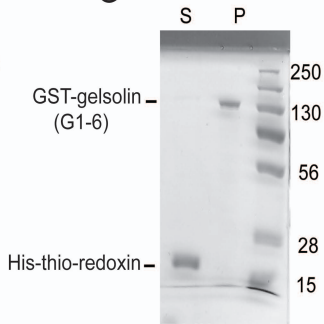

A

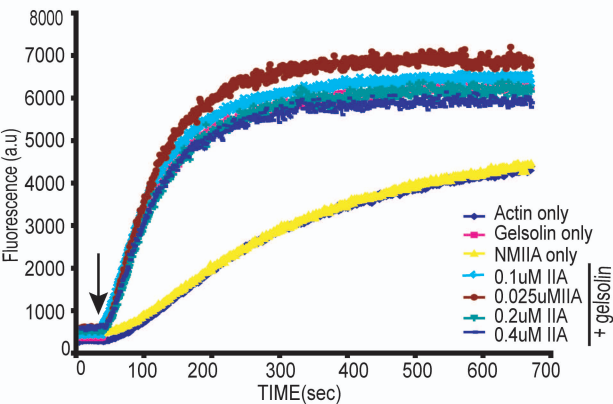

B

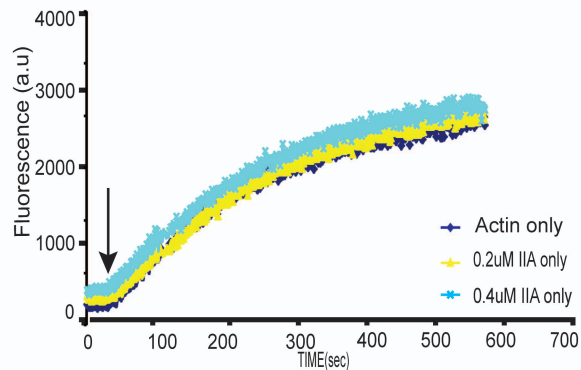

C

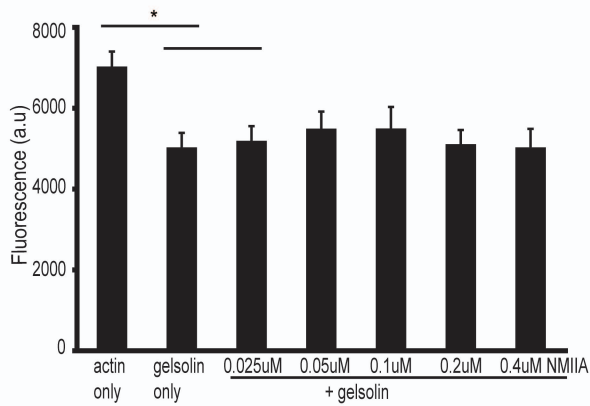

D

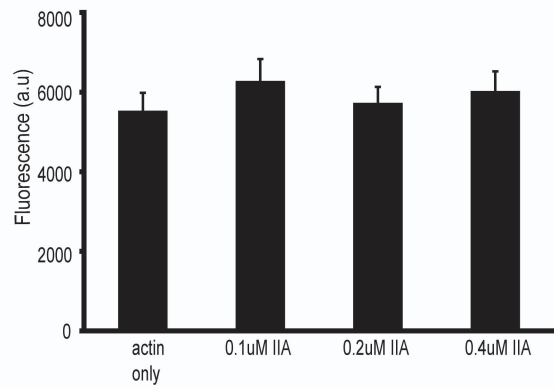

Supplement: supp_E12-10-0754_CombinedSupMats.pdf [file supp_E12-10-0754_CombinedSupMats.pdf]
